# Supplementary material
Source: MDPI journal article supplement (https://www.mdpi.com/1999-4907/13/10/1590)
Supplement: s1 [file s1 › Supplemental tables.xls]

## Sheet: Sheet2
Table S1 Accession numbers of Taxus species used in our study
Species	accession numbers
T. chinensis	KX431996
T. cuspidata	MK423905
T. yunnanensis	MN327640
T. wallichiana	MK423906
T. brevifolia	MH390457
T. calcicola	MH390451
T. canadensis	MH390448
T. contorta	MH390455
T. floridana	MH390468
T. globosa	MH390467
T. phytonii	MH390470
T. sp. Emei type	MH390472
T. sp. Huangshan type	MH390469
T. sp. Qinling type	MH390481
T. baccata	KR476375
T. mairei	KJ123824
T. florinii	MH390437
T. fuana	MF278259
P. chienii	MH390485

## Sheet: Sheet1
Table S2 Comparisons of repeat sequences across the Taxus plastomes using P. chienii as outgroup
Indel Feature	NO.	Length (bp)	Repeat Sequence	Location
Insertion	Rd1	40	AAAAAGAATAGGTCGCATTCTAAGAAGAATGATAGAATAT	ycf1/chlN, ndhF/rpl32
Insertion	Rd2	47	AATCTAAAAGTTTTTAGATTCAAAATCAGAAGTGATTAGTTTAAAGT	rrn16/rrn23
Insertion	Rd3	35	TATAACTCCTTATGGTTTGATTTAAGTATATTTTT	ycf1/chlN
Insertion	Rd4	34	ATTCATTAAGTTCTATTATGTAGATTAACAATTA	rrn16/rrn23
Insertion	Rd5	68	CATCGACCCATTTTGCAAATGACAAGAGTATACTATCAACAAGAGTTTGAATTCATACAATTCATACA	ycf2
Insertion	Rd7	36	CTATCCCTTTTTTCTATGAAAACTAAACTAGAATCT	rrn16/rrn23
Insertion	Rd8	60	GAGAAAGGGAATAGAATAACAGGGTTTATAATAATGTGACGACTATATTAATTATATATA	ycf1/chlN
Insertion	Rd10	49	GTATAGAGTCCATACTCTATTATTGTATAGAGTTTATTGAGATTCTATC	rrn16/rrn23
Insertion	Rd11	185	TATTAACTAACTAAATAACAGTTTTGAGAAATGGAATAGAATAACAGGGTTTATAATAATGTGACGACTATATTATTAATGATTATATATAGTCAATATAGTGATTGTCAATATTATTCACTATATTAATAACATATATTTATATATTGATTGGCTTACTATATTGTATATTGATTGGCAATAAT	ycf1/chlN
Insertion	Rd12	46	TCTATCCCTTTTTCCTATTAAAACTAATATATAACTATAAGATTAA	trnV-GAC/trnR-ACG
Insertion	Rd13	42	TTTGATTTAAGTATATTTTTGAGAAATGGGATAGAATAACAG	ycf1/chlN
Insertion	Rd14	39	TTTTTCCTATTAAAACTAATATTAAACTATAAGATTAAT	rrn16/rrn23
Insertion	Rp1	92	AGATACCAAAAGAGAGGTATATTTTTATAATTTGACTTGACAATTAGACTATAAATAGATATAATATATCTATAGATACCAAAAGAGAGGTA	trnI-CAU/ycf2, trnI-CAU
Insertion	Rp2	152	AGCAAGTAAATTTTATACTTGACAGTAAGTATCGAATCAGATTAACCCAATTGATTATATCATACTCAATTGAATTCATGCTTATTATTTAAAATATTAAATAGAGATTTATGACATATCTTTGTCATTTTGAATGATGGGATTTCTATACT	trnI-CAU/ycf2, trnI-CAU
Insertion	Rt1	60	TTAAATGGATCTTTTAGACAAACAAATGATAATAATCAAAATGGACGTCCAACTCTAAGG	accD
Insertion	Rt2	66	AACAATTCTCTTCAAAAAAGATTCAAGAGATTCTATTTGTTGAAGAACGCATTTATGAAGATAATT	ycf2
Insertion	Rt3	35	AACATTATATAATAAAACTACATTAACATTATATA	trnI-CAU/ycf2
Insertion	Rt6	72	AAGAATTTACAATTTTCTTACAATTGTAATTTACAATTATCTTCCAAACATAATTTACAATTGTCTTCCAAC	ycf2
Insertion	Rt7	80	CTTATTAAGGTAAGGGATTTGCAGTCCCCTTTAAGGTAAGGGATTTAAAGTCCCTTATTAAGGTAAGGGATTTGCAGTCC	trnC-GCA/rpoB
Insertion	Rt9	66	ATCTTCAAAATAGATTCTATTTGTTGAAGAACGCATTTATGAAGATAATTAACAAAATTAACAATT	ycf2
Insertion	Rt10	71	AATTATCTTCATAAAAGATTCAAGAGATTCTATTTGTTGAAGTTGAAGAACGCATTTATATTTATGAAGAT	ycf2
Insertion	Rt12	60	ACAAAAAAATAATCAAACAGAAGAAATAGAAGAAGAATATTTCGGAGATTCTAGCCATTT	accD
Insertion	Rt13	68	ACAATTAACATACTATATACAATAATAGAGTTCATTTATACTTATAATTCATTAAGTATAATATGTTT	rrn16/rrn23
Insertion	Rt14	42	ACAATTATCTTCATCTTCAAAAAATATTCAATAGATTCTATT	ycf2
Insertion	Rt16	68	ACATATTTAAGACTGAGTTCATAAGTGAGCTCATTGTCCCAGGTCGGAACAAGTTATCTATTATGATA	rrn16/rrn23
Insertion	Rt20	37	ATAGATAGGAATAAACTTATGAGTTAGAGATATATGA	psbD/trnT-GGU
Insertion	Rt22	101	ATATAATATATATATATATATATTATATCTAAATAGTATATTTAAAGCAATAGGCATGAATCGAATAATAAGAGAATCAGATTGGGTACCTAATATAAGAT	trnH-GUG/end
Insertion	Rt24	53	ATTAAAGTTATATTAGTAACTTTAACACTGATATTAAAGTTATATAATATAAT	clpP/infA
Insertion	Rt26	57	TCATTAAGTATAATGTGTTTTATACTCTCTACAATAATAGAGTTTAGTTATACTTAT	rrn16/rrn23
Insertion	Rt27	84	ATTCTATTTGTTGAATAACGCATTTATGAAGAGAATTCTTAATTCTCTTCATAAAATTGACAATTATCTTCATCTTCAAAAAAT	ycf2
Insertion	Rt28	30	TTGTCCCAGGTCGGAACAAGTTATCTATTA	rrn16/rrn23
Insertion	Rt29	69	ATTTTAAATACTTGACAATTAGACTATAAATAGATATAATCTATCTATAGAGACCAAAAGAAAGGTAGA	trnI-CAU/ycf2
Insertion	Rt30	68	ATTTTTCATATTTGACAATTAGACTATAAATAGATATAATCTATTTATAGAGACCAAAAGAGAGGTAG	trnI-CAU/ycf2
Insertion	Rt34	30	TACATCTAAATATAAACCATCTTCTAGGAA	rps18
Insertion	Rt35	88	CTAAATAGTATATTGAAAGCAATAGGCATGAATCGAATAATAAGAGAATCAGATTGGGTACCTAATATAAGATAATATATATAGATAT	trnH-GUG/psbA
Insertion	Rt36	33	CTAGTCTTAATGAATATTCTTATAATTATATTT	ycf1
Insertion	Rt37	49	CTATAGGATTTTATCCTATTTTCCTATTAAAACTAAAACTATAAGATAA	rrn16/rrn23
Insertion	Rt40	50	CTTTTAGACAAACAAATGATAATAATCAAAATGGACGTCCAACTCTAAGG	accD
Insertion	Rt41	64	GAAAGTCCCTTATTAAGGTAAGGGATTTAAAGTCCCCTTTAAAACAGATTTAATAAGGGATTTG	trnC-GCA/rpoB
Insertion	Rt42	132	GAAATTCTTAATTCTCTTTATCTTGAAATTCAGAGAATTCTTATTTATCTTGATGAAATTCTTAATTCTCTTTATCTTGAAATTCAGAGAATTCTTTTTTTTCTTGATGAAATTAAGAATTATCTTTATCTT	ycf2
Insertion	Rt43	121	GATATAATCTATCTAATCAAAACAAAGGTCTTAGATATGATCTATCTAATCAAAACAAAGGTCTTAGATATGATCTATCTAATCAAAACAAAGGTCTTAGATATGATCTATCTAATCAAAA	ycf2
Insertion	Rt44	56	TAAAATATTCAAGAGATTCTATTTGTTGAAGAACGCATTTATGAAGATAATTAACA	ycf2
Insertion	Rt45	41	GGATATTGAAAATATAACTAGAATCTATCCCTTTTTCCTAT	trnV-GAC/trnR-ACG
Insertion	Rt47	29	GGGTTTCACCCCCAGACAACATGTAATAG	rrn16/rrn23
Insertion	Rt48	42	GTCTTGAAGAGGATTCAATGGGCGTTACAATATTATCATTAT	ycf2/trnL-CAA
Insertion	Rt49	41	TGTCTCAGGCGTACTTTTTCATTTATGGTTTTTAATTCTGG	rrn5
Insertion	Rt51	53	TAAAAATGGTGAATATGGTAAAGATGATGACGATGGTAAAGATGGTGAAGATG	clpP
Insertion	Rt52	36	TAAAATGATGACAATTAGACTATAAATAGATATAAT	trnI-CAU/ycf2, trnI-CAU
Insertion	Rt53	184	TAATATCCCAATCCCAAAAATGTAAAGTCAATAATCTCTCAAACAATACACATTTATATTATAATATCCCAATCCCAAAAATGTAAAGTCAATAATCTCTCAAACAATACACATTTATAATTATATATCACAATCCCAAAAATGTCAAGCCAATAATCTCTCAAACAATACACATTTATAATTA	ycf1/chlN
Insertion	Rt54	31	TATTCCAATCTTTCAATCGTAGAACAAAAGA	psaI/ycf4
Insertion	Rt56	49	TATTCTATTTGTTGAAGAACGTATTCTATTTGTTGAAGAACGTATCTAT	ycf2
Insertion	Rt57	36	TCATTTGAAATATATTCTTCATTTGAAATATATTCT	rpl28*
Insertion	Rt61	64	TCTTTATCTTCAAATTAAGATAATTCTTAATTCTCTTCATAAAATTGACAATTATCTTTATCTT	ycf2
Insertion	Rt63	164	TTTTGTTTATAATATTTATAAACAAAAAATTAATATTGACCTTGTTTTATATGAAGAAATGAATAATTATATGAAGAAATGAATAAAAAGGGATTTTGTTTATAATATTTATAAACAAAAAATTAATATTGACCTTGTTTTATATGAAGAAATGAATATTTATA	rrn4.5/rrn5
Insertion	Rt64	34	TTACTATATTGATTGGCTTACTATATTGATTGGC	ycf1/chlN
Insertion	Rt65	52	TTTTGAGAAATGGGATAGAATAACAGTTTTGATAAAGGGAATAGAATAACAG	ycf1/chlN
Insertion	Rt66	32	TTTTATTCGATTCAATGATAATCTTGTATCTC	trnF-GAA/ndhJ
Insertion	RT67	67	TTCTAAAATGTAACTATAAAATTGTTCTAAAATAGAACTATAAGATTGTTCTAAAATATAACTATAA	rrn16/rrn23
Insertion	Rt68	96	TTCTCTTTACAAGAAATCTGAATATTCTCTTTACAAGAAATCTGAATATTCTCTTTACAAGAAATCTGAATATTCTCTTTACAAGAAATCTAAATA	matK/trnK-UUU*
Insertion	Rt69	40	TTCTTATTACTAATTAACTTATTTATTTACTATTTAACTT	trnI-CAU/ycf2
Insertion	Rt71	48	TTAAATCCCTTATTATTATTAAATCTGTTTTATGTTTTAAAAGGGACT	rpoB/trnC-GCA
Deletion	Rd11	121	TATTAACTAACTAAATAACAGTTTTGAGAAATGGAATAGAATAACAGGGTTTATAATAATGTGACGACTATATTATTAATGATTATATATAGTCAATATAGTGATTGTCAATATTATTCAC	ycf1/chlN
Deletion	Rd13	42	TTTGATTTAAGTATATTTTTGAGAAATGGGATAGAATAACAG	ycf1/chlN
Deletion	Rd3	49	ATATATAACTCCTTATGGTTTGATTTAAGTATATTTTTGAGAAATGGGA	ycf1/chlN
Deletion	Rd6	70	CGGAGAAATAAATAAACCATCTTCTCAGGATACAAGTAATCCTAATATATCTACAGATAAACCGTCTACG	rpl33/rps18
Deletion	Rd8	86	GAGAAATGGGATAGAATAACAGTTTTGAGAAAGGGAATAGAATAACAGGGTTTATAATAATGTGACGACTATATTAATTATATATA	ycf1/chlN
Deletion	Rd9	124	GGAGTTTATTAAGTAAGAAGTTTTTCAACTCATATAACTTACTACTAAGTAAGTATAGAAGTTTATTAATATAATTCTTGCTTATTGTTTTTATAAGAAGCAAACATTGATGAAATTCTTTTTT	ycf1
Deletion	Rp3	44	TATCTTTCCGGAGAATATTATCGACAACTCTTTCTTGAGATCCA	chlB, trnL-UAA*
Deletion	Rt1	114	AAATGGATGTCCTAAACGAACAAATGATAATAATCAAAATGGACGTCCAACTCTAAAGTTAAATGGATGTTTTAGACAAACAAATGATAATAATCAAAATGGACGTCCAACTCT	accD
Deletion	Rt4	35	GAATAGAAACTAAGACAGACAATTTCAATTGTCTG	rrn16/rrn23
Deletion	Rt5	62	AAGAAGAAAGACAATTGAGGACAAACATGGAAGAAAAAAGACAATTGAGAACAAAAATGGAA	rrn16/rrn23
Deletion	Rt7	83	TAAGGGATTTAAAGTCCCTTATTAAGGTAAGGGATTTGCAGTCCCCTTTAAGGTAAGGGATTTAAAGTCCCCTTTAAAACAGA	trnC-GCA/rpoB
Deletion	Rt8	29	AATAATAGTAATCTATCGGTCAATAATAG	ndhG/ndhI
Deletion	Rt9	64	TTAACAATTATCTTCAAAAAAGATTCAAGAGATTCTATTTGTTGAAGAACGCATTTATGAAGAT	ycf2
Deletion	Rt15	61	ACAGATACGCCGTCTAACACTAATACGACAGATACGCCGTCTAACACTAATACGACAGATA	rpl33/rps18
Deletion	Rt17	29	ACATTATCACTATATCTATACATTGATCT	trnI-CAU/ycf2
Deletion	Rt18	52	ACCGAAAGATTTTAACCTTGTTTTAGATGAAGAAATGAATAAAAATGGATTT	rrn4.5/rrn5
Deletion	Rt19	406	TTTTAAGTATTCAAATGTTAATGATTGGAGAGATATCTATATCTATCAATATAGATAGATATAGATATATAATAATAAAATCTATATTGTTTTCAACTATTCAAATGTTCTTGATTGCAGAGAGATCTATATCTATCAATATAGATAGATATAGATATATAATAATAAAATCTATATTGTTTTCAACTATTCAAATGTTCTTGATTGGAGAGATATATATATCAATATAGATAGATATATATATCATAAAATATATTATATGTTCTTGAAGTATTCAAATGTTCATGATTGGAGAGATATATATATCAATATAGATATATCATAAAATCTGTAAATGTTTAAGTATTCAAATGTTAATGATTGGAGAGATATATATATCTATCAATATAGATAGATATA…	trnV-GAC/rrn16
Deletion	Rt21	100	ATAGATATATCATAAAATCTGTAAATGTTTAAGTATTCAAATGTTAATGATTGGAGAGATATATATATCTATCAATATAGATAGATATATATATCATA	trnV-GAC/rrn16
Deletion	Rt23	34	ATGAAAACTAAACTAGAATCTATCCCTTTTTCCT	rrn16/rrn23
Deletion	Rt25	36	TTCATTATCCAATCCTTCTTTATTATCCAATCCTTC	ycf1
Deletion	Rt26	47	ATTCATTAAGTATAATGTGTTTTATACTCTCTACAATAATAGAGTTT	rrn16/rrn23
Deletion	Rt28	72	ATTGTCCCAGGTCGGAACAAGTTCTCTATTATGATAGGACCTTTGATAGGACCTTGTTCACTTTTTTTTTAC	rrn16/rrn23
Deletion	Rt30	136	ATTTTTCATATTTGACAATTAGACTATAAATAGATATAATCTATTTATAGAGACCAAAAGAGAGGTAGATTTTTCATATTTGACAATTAGACTATAAATAGATATAATCTATCTATAGAGACCAAAAGAGAGGTAG	trnI-CAU/ycf2
Deletion	RT31	66	CAAGAGATTCTATTTGTTGAAGAACGCATTTATGAAGATAATTAACAAAATTAACAATTATCTTCA	ycf2
Deletion	Rt32	63	CATCTACAGATACGCCATCTTCTCGGAATACATCTACAGATACGCCATCTTCTCGGAATACAT	rps18
Deletion	Rt33	30	CATTGATCTACATTATCAATATATCTATAC	trnI-CAU/ycf2
Deletion	Rt34	60	CGTCTTCTCGGAATACATCTAAATATAAACCATCTTCTAGGAATACATCTAAATATAAAC	rps18
Deletion	Rt38	30	TGGGATAGAATAACAGGGAATAATGAATTC	ycf1/chlN
Deletion	Rt39	42	TTCTAGTTTTATCCTTTCTAGTTTTAGAATAATAGGAATCAT	ycf1
Deletion	Rt46	70	GGGGACTTTAAATCCCTTACCTTAAAGGGGACTGCAAATCCCTTACCTTAATAAGGGACTTTAAATCCCT	rpoB/trnC-GCA
Deletion	Rt49	41	GTGTCTCAGGCGTACTTTTTCATTTATGGTTTTTAATTCTG	rrn5
Deletion	Rt50	111	GTTTTTAAGTATTCAAATGTTCATGATTGGAGAGATATCTATATCTATCAATATAGATTTGAGATATATAGATCATATATATCATAAAATCTATATTGTTATTGAAGTATT	trnV-GAC/rrn16
Deletion	Rt55	31	TATTCTATAATTATAAGTTCATTCTATAATT	trnL-CAA/ndhB*
Deletion	Rt58	30	TCTAAATATAAGCCGTCTTCTCGGAATACA	rps18
Deletion	Rt59	40	TCTACATGTAATATATGTATATTAATAACATAAAATTTCT	accD/infA
Deletion	RT60	34	TCTATCCCTTTTTCCTATGAAAACTAAACTAGAA	rrn16/rrn23
Deletion	Rt62	36	TGAAGAACAAAAAGTCATCATTGAAAAAGAAAAAGT	clpP
Deletion	Rt65	52	TTTTGAGAAATGGGATAGAATAACAGTTTTGATAAAGGGAATAGAATAACAG	ycf1/chlN
Deletion	Rt69	40	TTCTTATTACTAATTAACTTATTTATTTACTATTTAACTT	trnI-CAU/ycf2
Deletion	Rt70	69	TGTTTTTAAGTATTCAAATGTTAATGATTGGAGAGATATCTATATCTATCAATATAGATATAGATATAT	trnV-GAC/rrn16
Note: Locations of repeat sequences within intergenic regions (with ‘/’), exons (marked as *) and introns.
